# Supplementary material
Source: publisher figshare collection journal article supplement (https://acs.figshare.com/ndownloader/files/5674305)

# BIOCHEMISTRY

including biophysical chemistry & molecular biology

Biochemistry, 1998, 37(18), 6263-6276, DOI:[10.1021/bi980136y](https://doi.org/10.1021/bi980136y)

## Terms & Conditions

Electronic Supporting Information files are available without a subscription to ACS Web Editions. The American Chemical Society holds a copyright ownership interest in any copyrightable Supporting Information. Files available from the ACS website may be downloaded for personal use only. Users are not otherwise permitted to reproduce, republish, redistribute, or sell any Supporting Information from the ACS website, either in whole or in part, in either machine-readable form or any other form without permission from the American Chemical Society. For permission to reproduce, republish and redistribute this material, requesters must process their own requests via the RightsLink permission system. Information about how to use the RightsLink permission system can be found at <http://pubs.acs.org/page/copyright/permissions.html>

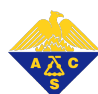

**ACS Publications**

MOST TRUSTED. MOST CITED. MOST READ.

Copyright © 1998 American Chemical Society

## SUPPLEMENTARY MATERIAL

Figure 1. Strips from the following spectra of reduced uniformly  $^{15}\text{N}/^{13}\text{C}$  labeled DsbA: CBCA(CO)NH (A), HNCA (B) and CBCANH (C). The arrangement shows the resonances of residues Asn156 - Asn162 belonging to the  $\beta$ -strands 4 and 5 of DsbA. The strips were taken at the  $^1\text{H}$  and  $^{15}\text{N}$  chemical shift of the residue of interest. The corresponding shifts are indicated below the strips. The  $^{13}\text{C}$ -chemical shift is indicated at the right side of the figure. Black arrows mark the sequential connectivities between  $\text{C}^\alpha$  atoms and white arrows mark the sequential connectivities between  $\text{C}^\beta$  atoms which can be derived from the three spectra.

Figure 2. A) Residue-based rms deviations of the backbone  $\phi$  (red line) and  $\psi$  (green line) and side-chain  $\chi_1$  (blue line) torsion angles from the averaged mean structure for the 20 SA structures.

B) Plot of the number of NOE distance constraints per residue versus amino acid sequence of DsbA. All constraints appear twice, once for each interacting residue. No intra-residue constraints are shown. Sequential constraints are coloured red, medium range NOEs ( $|i-j| < 5$ ) green, and long range NOEs ( $|i-j| > 4$ ) are shown in blue.

Figure 3. A) Ramachandran plot for the family of 20 SA structures of reduced DsbA. Glycine residues are indicated by blue crosses, all other residues by blue dots. The allowed regions were determined from 378 different crystal structures with

a resolution of 2.5 Å or better. The regions where the density of  $\phi/\psi$ -points from this statistics is highest are marked in colour. The green regions contain 80% of all points, the green and yellow regions together 95% and all coloured regions together 98%. Figure produced with MOLMOL.

B) Ramachandran plot for the energy minimized average structure of reduced DsbA and for the crystal structure of oxidized DsbA. Glycine residues are indicated by crosses, all other residues by dots. The energy minimized average structure of reduced DsbA is indicated by blue symbols. Red and orange symbols represent molecule A and molecule B, respectively, from the crystal structure of oxidized DsbA. Figure produced with MOLMOL.

Figure 4. Sausage plot showing a smooth spline curve through the positions of the C $\alpha$  atoms of the protein backbone. The diameter of the spline curve is proportional to the rmsd of the structure family from the mean structure. The N and C terminus of the protein are depicted. Figure produced with MOLMOL.

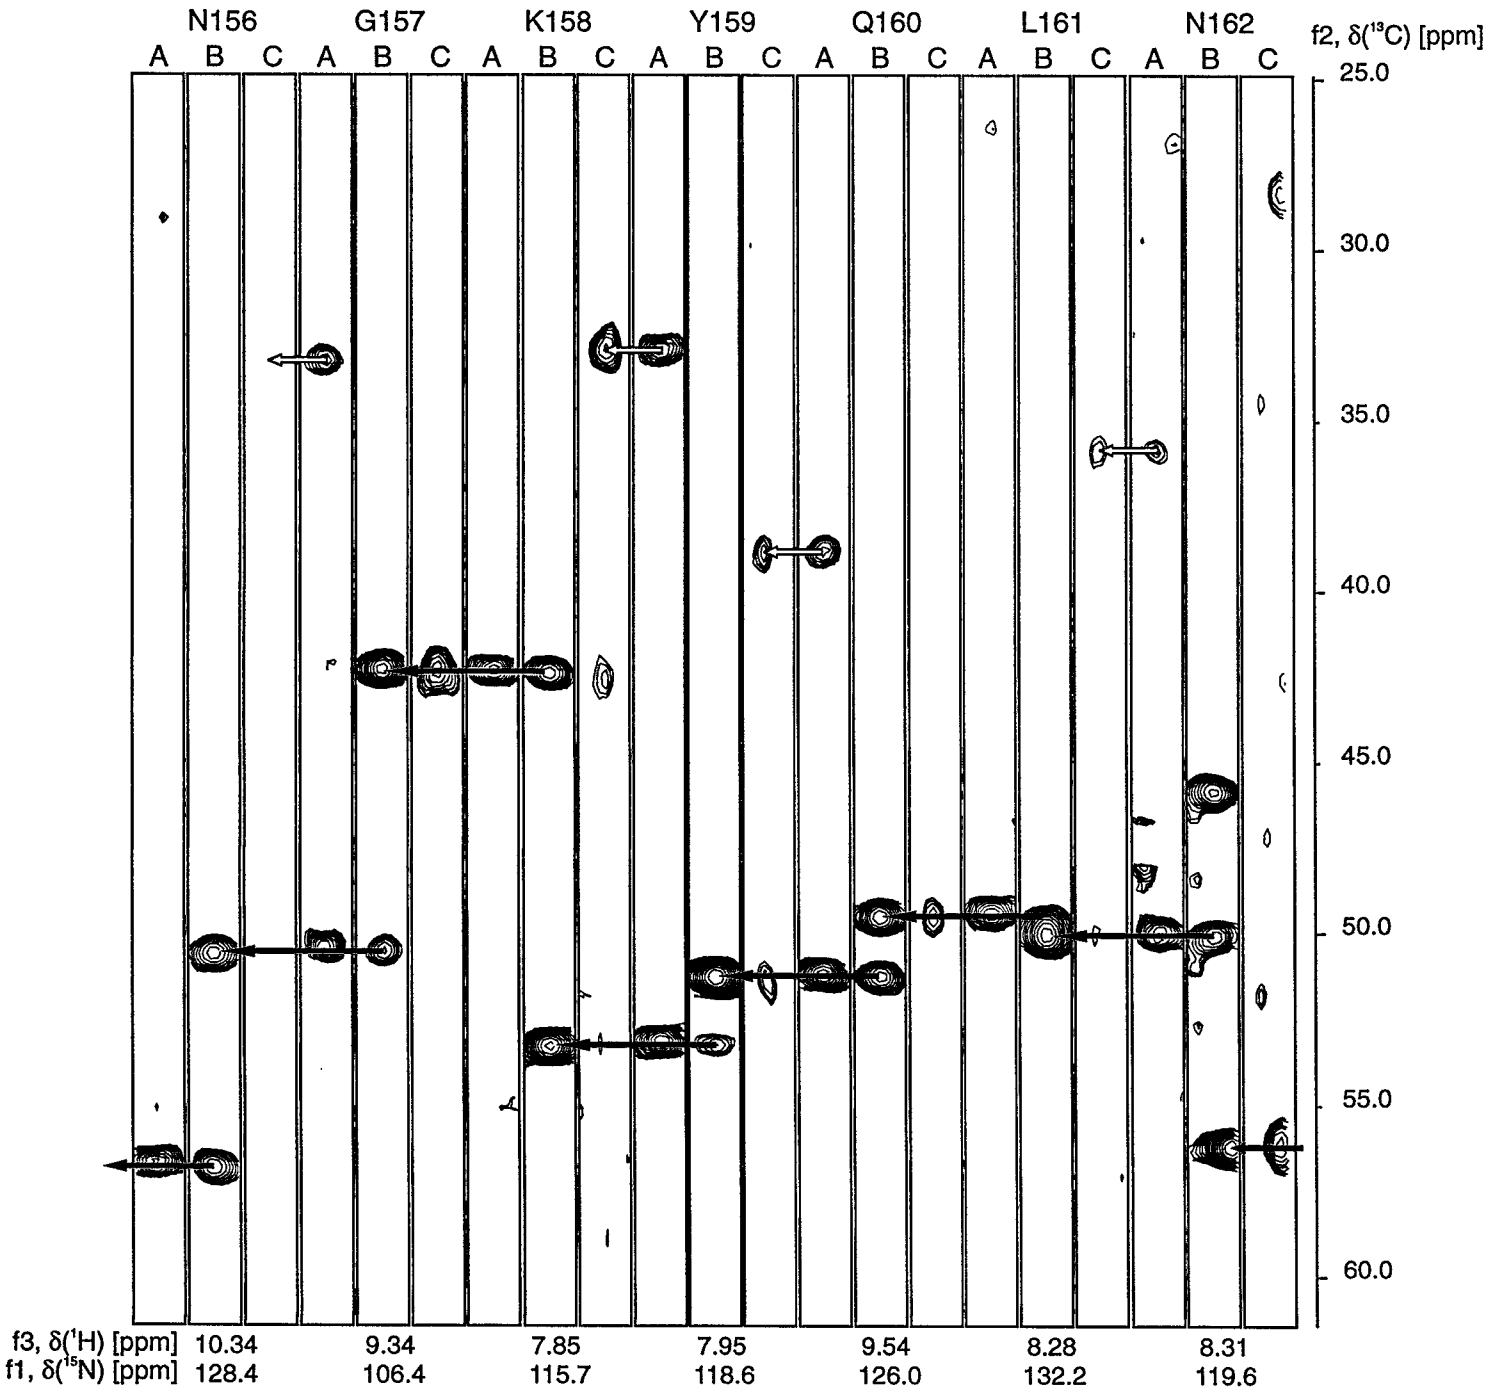

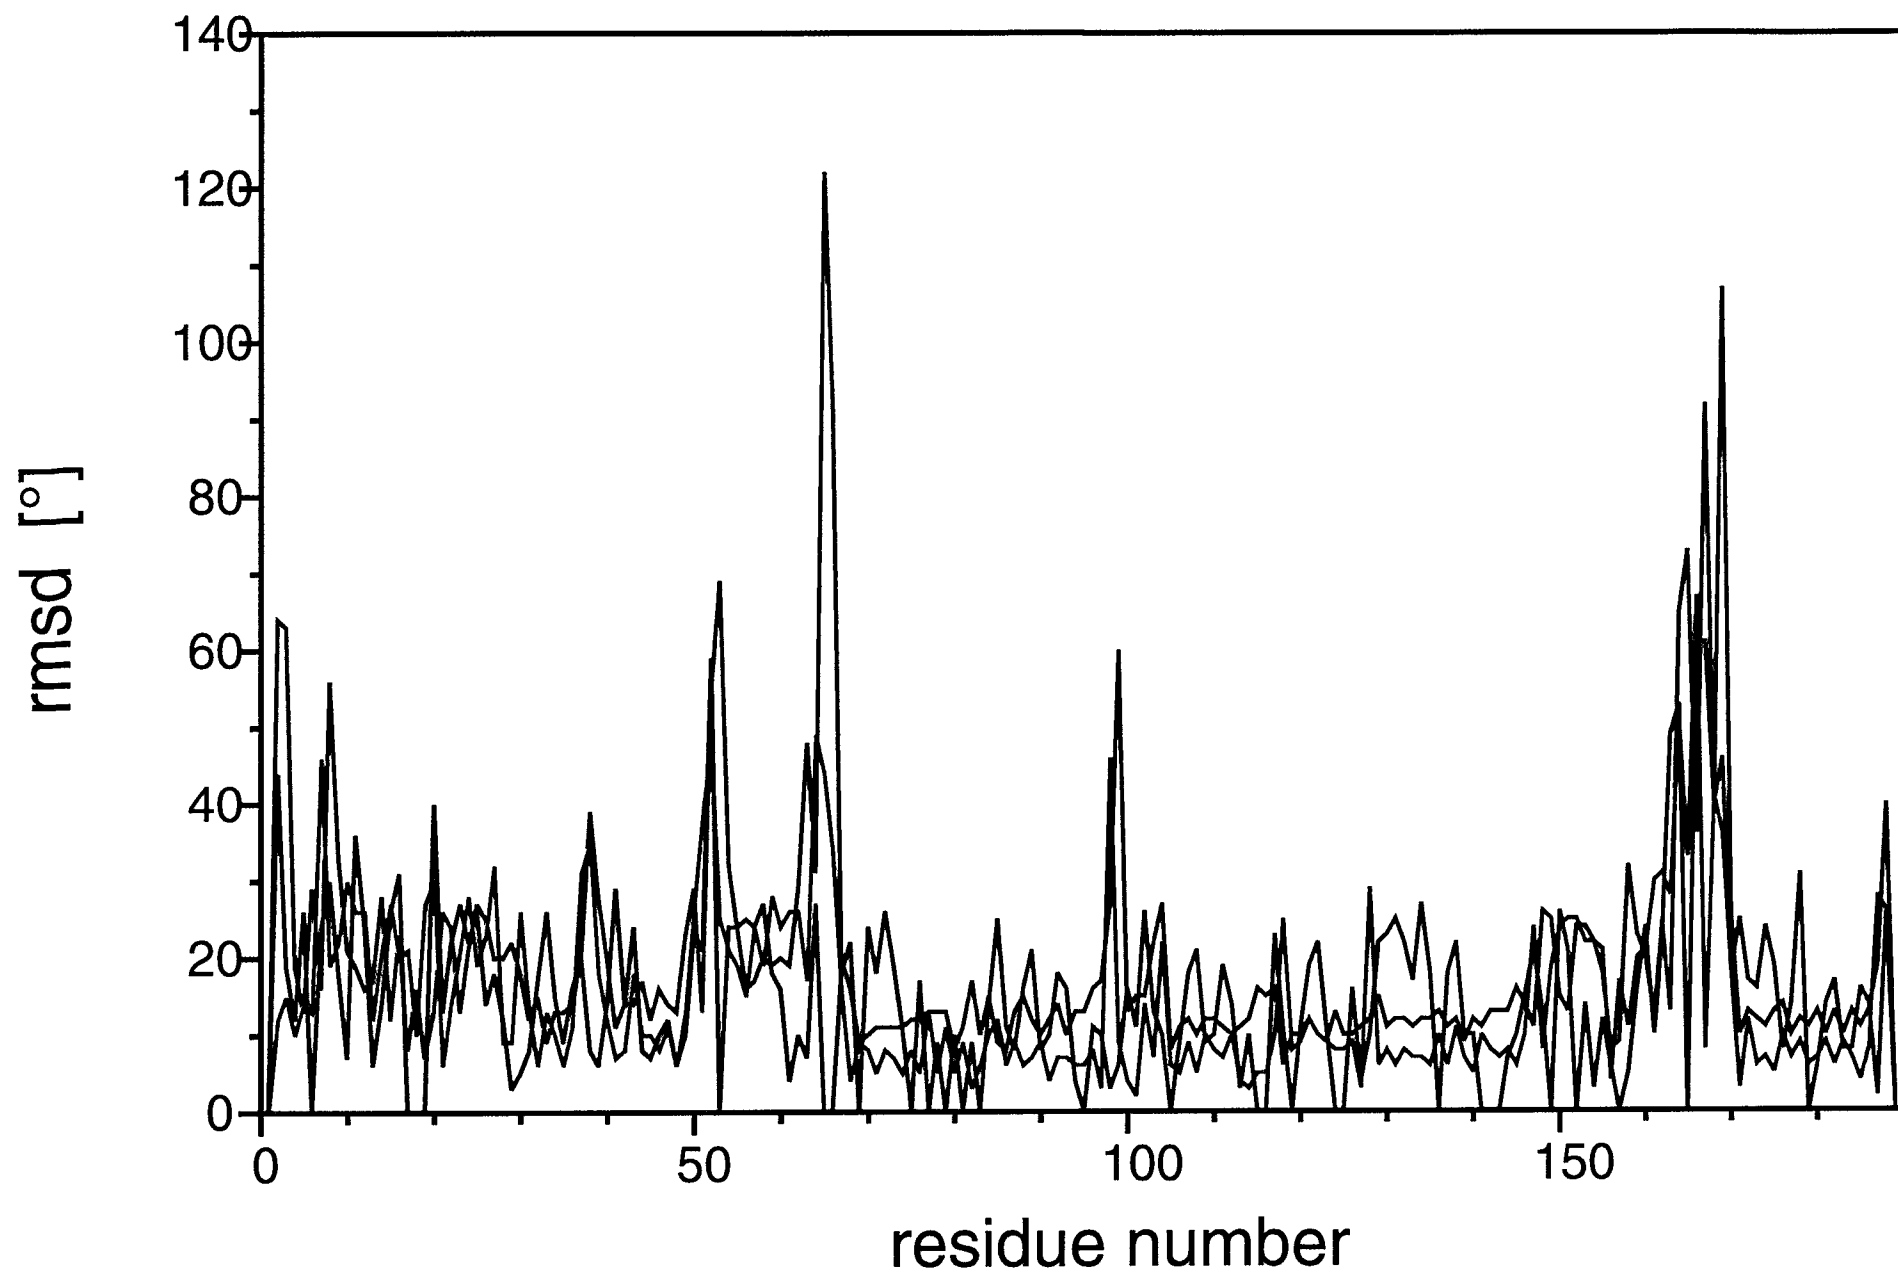

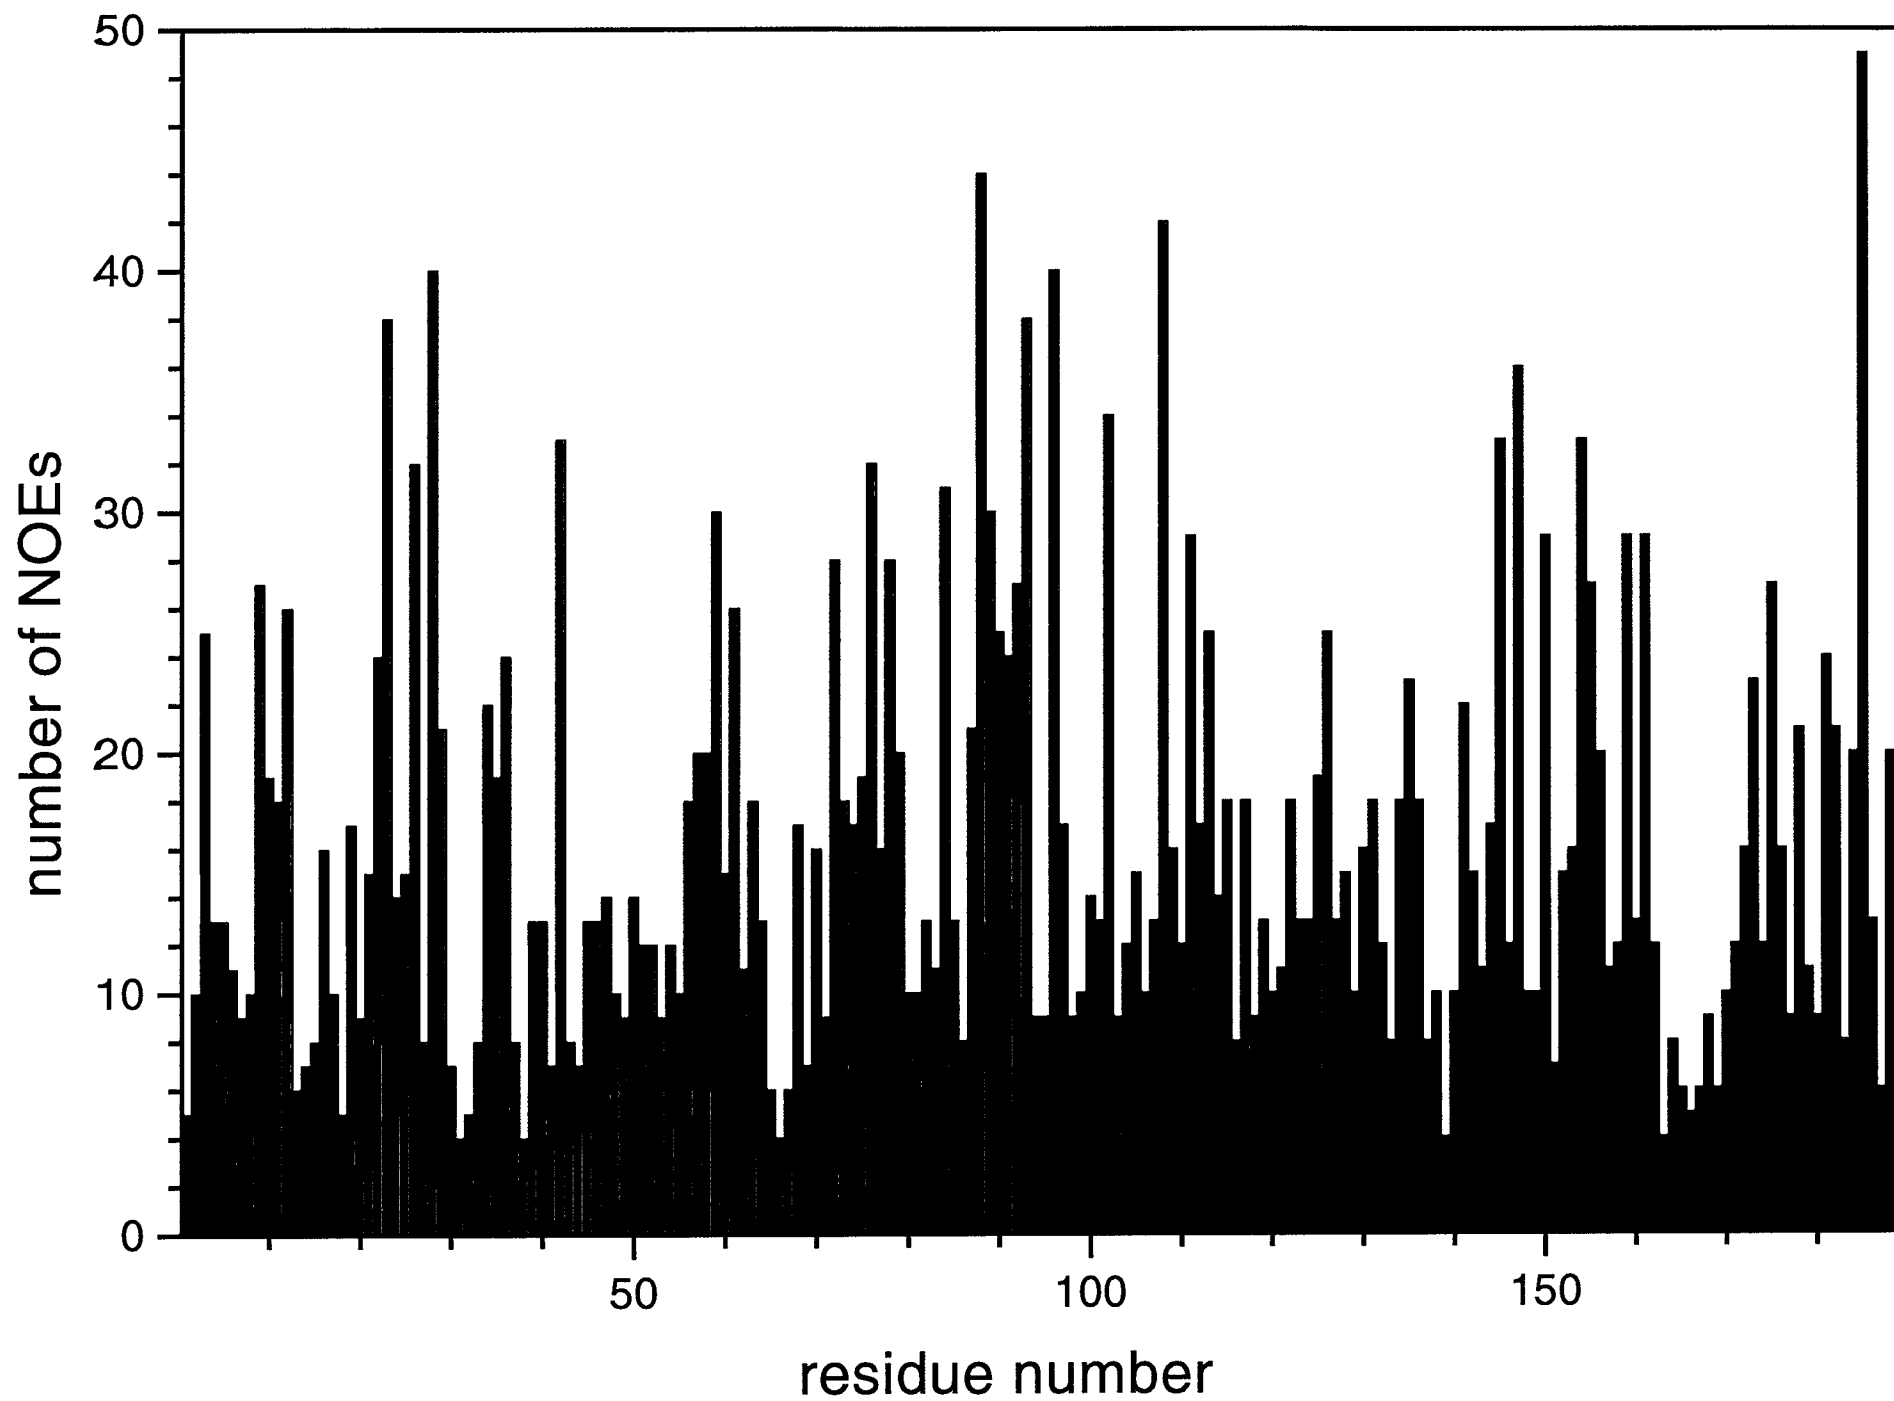

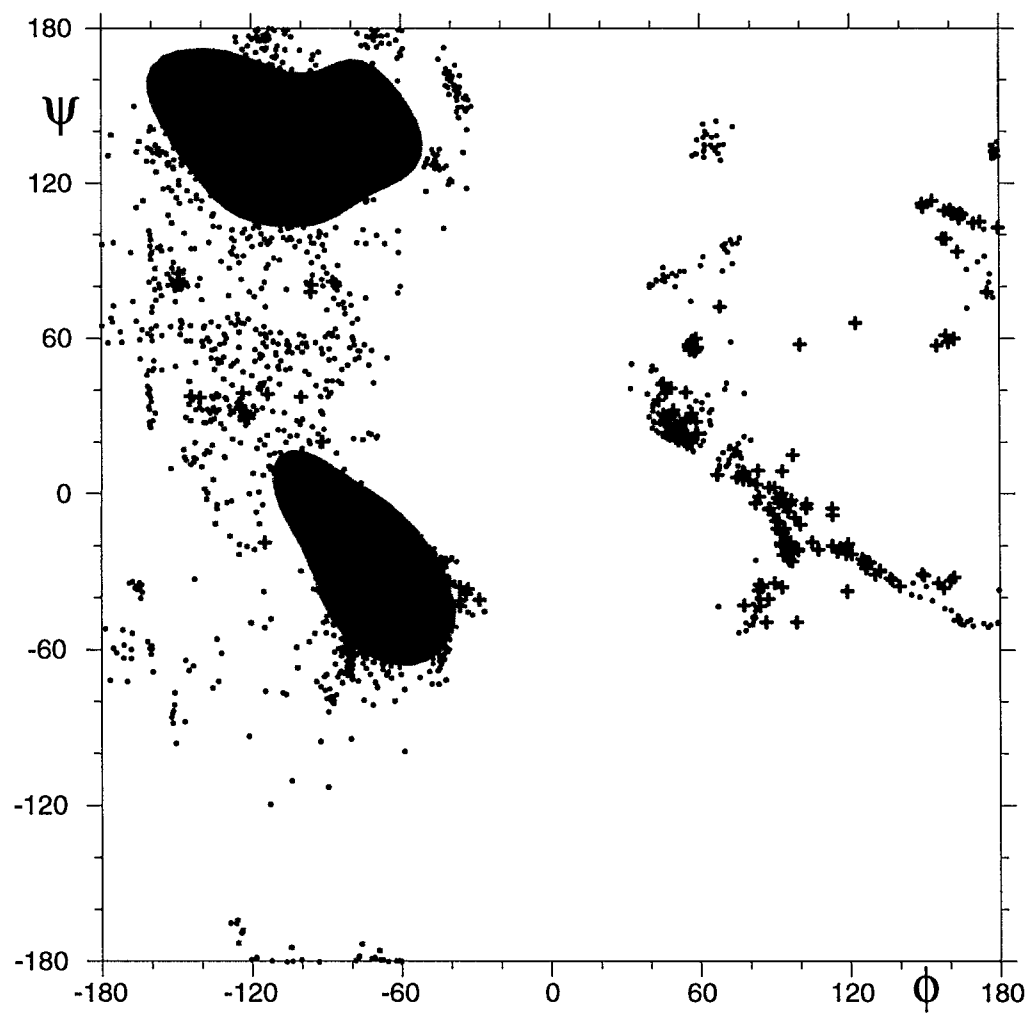

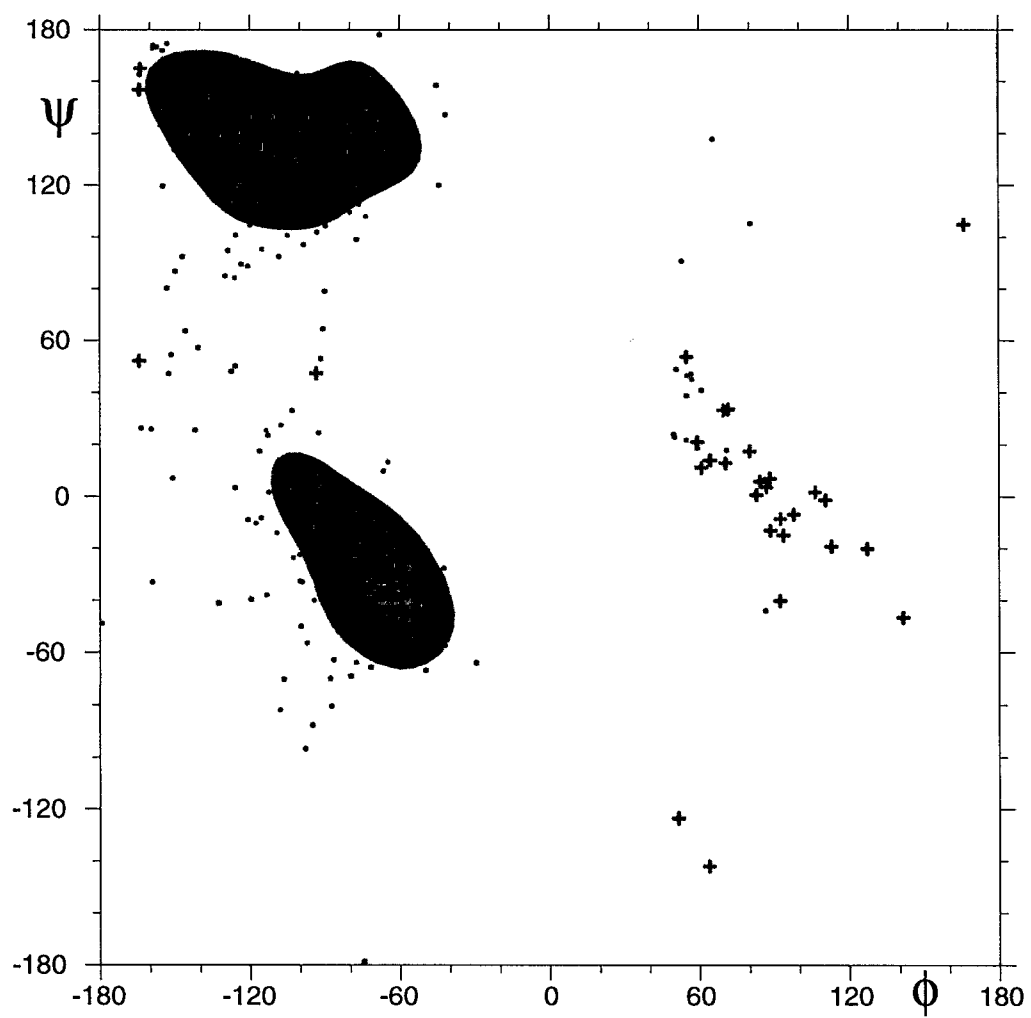



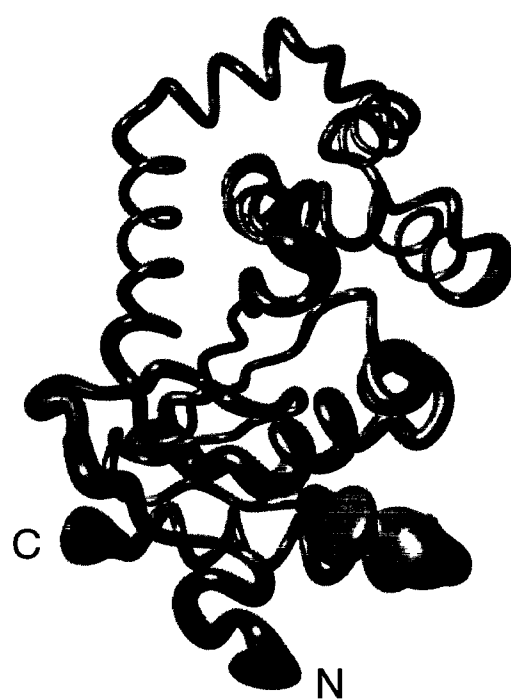

Supplement: Supplementary file 1 [file 5674305]
